# Supplementary material for: Changing trends in the incidence, management and outcomes of coronary artery perforation over an 11-year period: single-centre experience
Source: HighWire-hosted journal article supplement (doi:10.1136/openhrt-2021-001916), 2022-04-01
Supplement: openhrt-2021-001916supp001_data_supplement.pdf [file openhrt-2021-001916supp001_data_supplement.pdf]

## Supplementary Material

**Supplementary Table 1: The Modified Ellis Criteria**

| Type | Description                                                                                                          |
|------|----------------------------------------------------------------------------------------------------------------------|
| I    | The development of an extraluminal crater without brisk extravasation.                                               |
| II   | Pericardial or myocardial blushing without brisk extravasation.                                                      |
| III  | Breach in the arterial wall that results in an extravasation jet through a frank perforation (width of $\geq 1$ mm). |
| IV   | Accumulation of blood into another anatomical cavity.                                                                |
| V    | Synonymous with a distal perforation.                                                                                |

**Supplementary Table 2: Comparison of angiographic and procedural characteristics between No CP and CP**

| <b>Variable</b>                                  | <b>No CP<br/>(n = 9633)</b> | <b>CP<br/>(n = 68)</b> | <b>P-value</b> |
|--------------------------------------------------|-----------------------------|------------------------|----------------|
| <b><i>Lesion complexity (ACC/AHA)</i></b>        |                             |                        |                |
| Type A, n (%)                                    | 331 (3)                     | 0                      | N/A            |
| Type B1, n (%)                                   | 1619 (17)                   | 14 (21)                | 0.406          |
| Type B2, n (%)                                   | 2198 (23)                   | 10 (15)                | 0.112          |
| Type C, n (%)                                    | 4280 (44)                   | 44 (65)                | <0.001         |
| <b><i>CTO attempted, n (%)</i></b>               | 993 (10)                    | 16 (24)                | <0.001         |
| <b><i>In-stent Restenoses, n (%)</i></b>         | 918 (10)                    | 8 (12)                 | 0.532          |
| <b><i>IVUS, n (%)</i></b>                        | 541 (6)                     | 12 (18)                | <0.001         |
| <b><i>Rotablation, n (%)</i></b>                 | 363 (4)                     | 5 (7)                  | 0.123          |
| <b><i>Cutting Balloon Angioplasty, n (%)</i></b> | 98 (1)                      | 3 (4)                  | <0.001         |
| <b><i>Hydrophilic wires, n (%)</i></b>           | 1454 (15)                   | 24 (35)                | <0.001         |
| <b><i>Multivessel stenting, n (%)</i></b>        | 3488 (36)                   | 18 (26)                | 0.096          |
| <b><i>GPIIb/IIIa inhibitors, n (%)</i></b>       | 2875 (30)                   | 14 (21)                | 0.096          |

*ACC/AHA, American College of Cardiology/ American Heart Association; CTO, chronic total occlusion; IVUS, intravascular ultrasound*

**Supplementary Table 3: Mechanisms of Perforation for Cohort A (1 January 2010 - 2 July 2015) and Cohort B (3 July 2015 and the 31 December 2020)**

| <b>Perforation cause</b>                      | <b>Cohort A, (n = 24)</b> | <b>Cohort B, (n = 44)</b> | <b>P-value</b> |
|-----------------------------------------------|---------------------------|---------------------------|----------------|
| <b><i>Guidewire</i></b>                       |                           |                           |                |
| Hydrophilic wire, <i>n (%)</i>                | 4 (17)                    | 13 (30)                   | 0.241          |
| Work Horse wire, <i>n (%)</i>                 | 4 (17)                    | 10 (23)                   | 0.555          |
| <b><i>Cutting balloon, n (%)</i></b>          | 0                         | 2 (5)                     | NA             |
| <b><i>Coronary stent, n (%)</i></b>           | 5 (21)                    | 10 (23)                   | 0.857          |
| <b><i>Balloon inflation</i></b>               |                           |                           |                |
| Pre-dilatation with NC balloon, <i>n (%)</i>  | 1 (4)                     | 2 (5)                     | 0.942          |
| Post-dilatation with NC balloon, <i>n (%)</i> | 10 (42)                   | 6 (14)                    | 0.009          |
| Pre-dilatation with SC balloon, <i>n (%)</i>  | 0                         | 1 (2)                     | NA             |
| Post-dilatation with SC balloon, <i>n (%)</i> | 0                         | 0                         | NA             |

*NC, Non-Compliant; SC, Semi-Compliant*
